# Supplementary material for: IGF1 receptor inhibition amplifies the effects of cancer drugs by autophagy and immune-dependent mechanisms
Source: PubMed Central journal article supplement — J Immunother Cancer. 2021 Jun 14;9(6):e002722. doi: 10.1136/jitc-2021-002722 (PMC8204183; doi:10.1136/jitc-2021-002722), 2021-06-14
Supplement: jitc-2021-002722supp002.pdf [file jitc-2021-002722supp002.pdf]

**Table S1. Clinicopathological associations of pIGF1R expression in triple-negative breast cancer**

| Clinicopathological parameters | pIGF1R               | pIGF1R               | P value*      |
|--------------------------------|----------------------|----------------------|---------------|
|                                | Negative<br>N=19 (%) | Positive<br>N=30 (%) |               |
| Age at diagnosis, years        | 52.3 ± 7.1           | 55.7 ± 12.9          |               |
| ≤50                            | 8(42.1)              | 4(13.3)              | <b>0.0392</b> |
| ≥51                            | 11(57.9)             | 26(86.7)             |               |
| Grade                          |                      |                      |               |
| High                           | 16(84.2)             | 16(53.3)             | 0.0718        |
| Moderate                       | 3(15.8)              | 8(26.7)              |               |
| Low                            | 0(0)                 | 6(20.0)              |               |
| T stage                        |                      |                      |               |
| T1                             | 6(31.6)              | 8(26.7)              | 0.8114        |
| T2                             | 12(63.1)             | 19(63.3)             |               |
| T3                             | 1(5.3)               | 3(10.0)              |               |
| N stage                        |                      |                      |               |
| N0                             | 13(68.4)             | 21(70.0)             | >0.05         |
| N1                             | 6(31.6)              | 9(30.0)              |               |
| M stage                        |                      |                      |               |
| M0                             | 19(100)              | 29(96.7)             | >0.05         |
| M1                             | 0(0)                 | 1(3.3)               |               |
| Ki67                           |                      |                      | <b>0.0338</b> |
| <14%                           | 0(0)                 | 7(23.3)              |               |
| ≥14%                           | 19(100)              | 23(76.7)             |               |
| Recurrence                     |                      |                      |               |
| No                             | 15(78.9)             | 21(70.0)             | 0.7408        |
| Yes                            | 4(21.1)              | 9(30.0)              |               |
| Median survival-up, months     | 43                   | 28                   |               |

All cases were diagnosed as invasive ductal carcinoma and classified according to the American Joint Committee on Cancer (AJCC) staging system. T: tumor; N: lymph node; M: metastasis.

\*P values calculated by Chi-square testing; bold if statistically significant (P < 0.05)
