# Supplementary figures and images for: IGF1 receptor inhibition amplifies the effects of cancer drugs by autophagy and immune-dependent mechanisms
Source: PubMed Central journal article supplement — J Immunother Cancer. 2021 Jun 14;9(6):e002722. doi: 10.1136/jitc-2021-002722 (PMC8204183; doi:10.1136/jitc-2021-002722), 2021-06-14

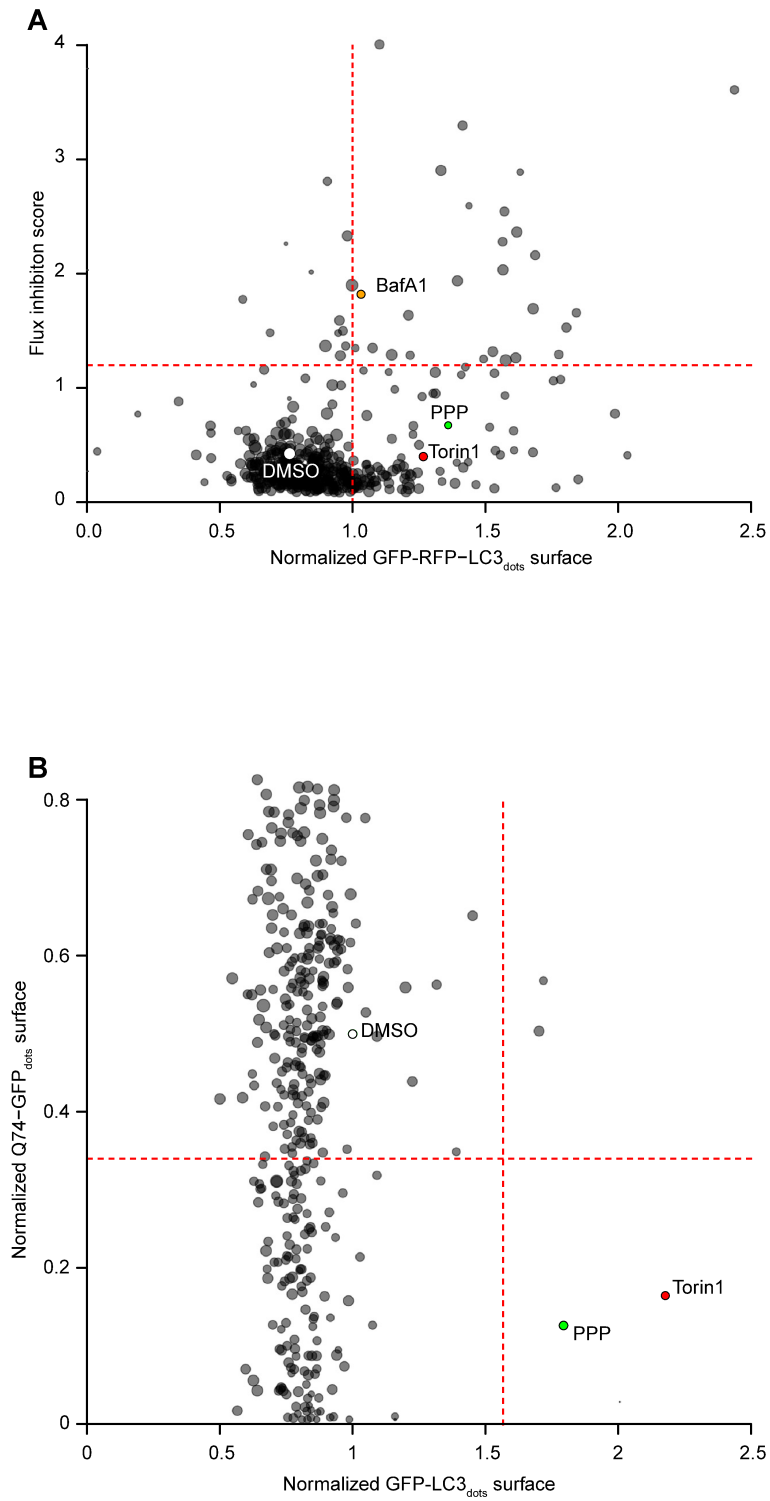

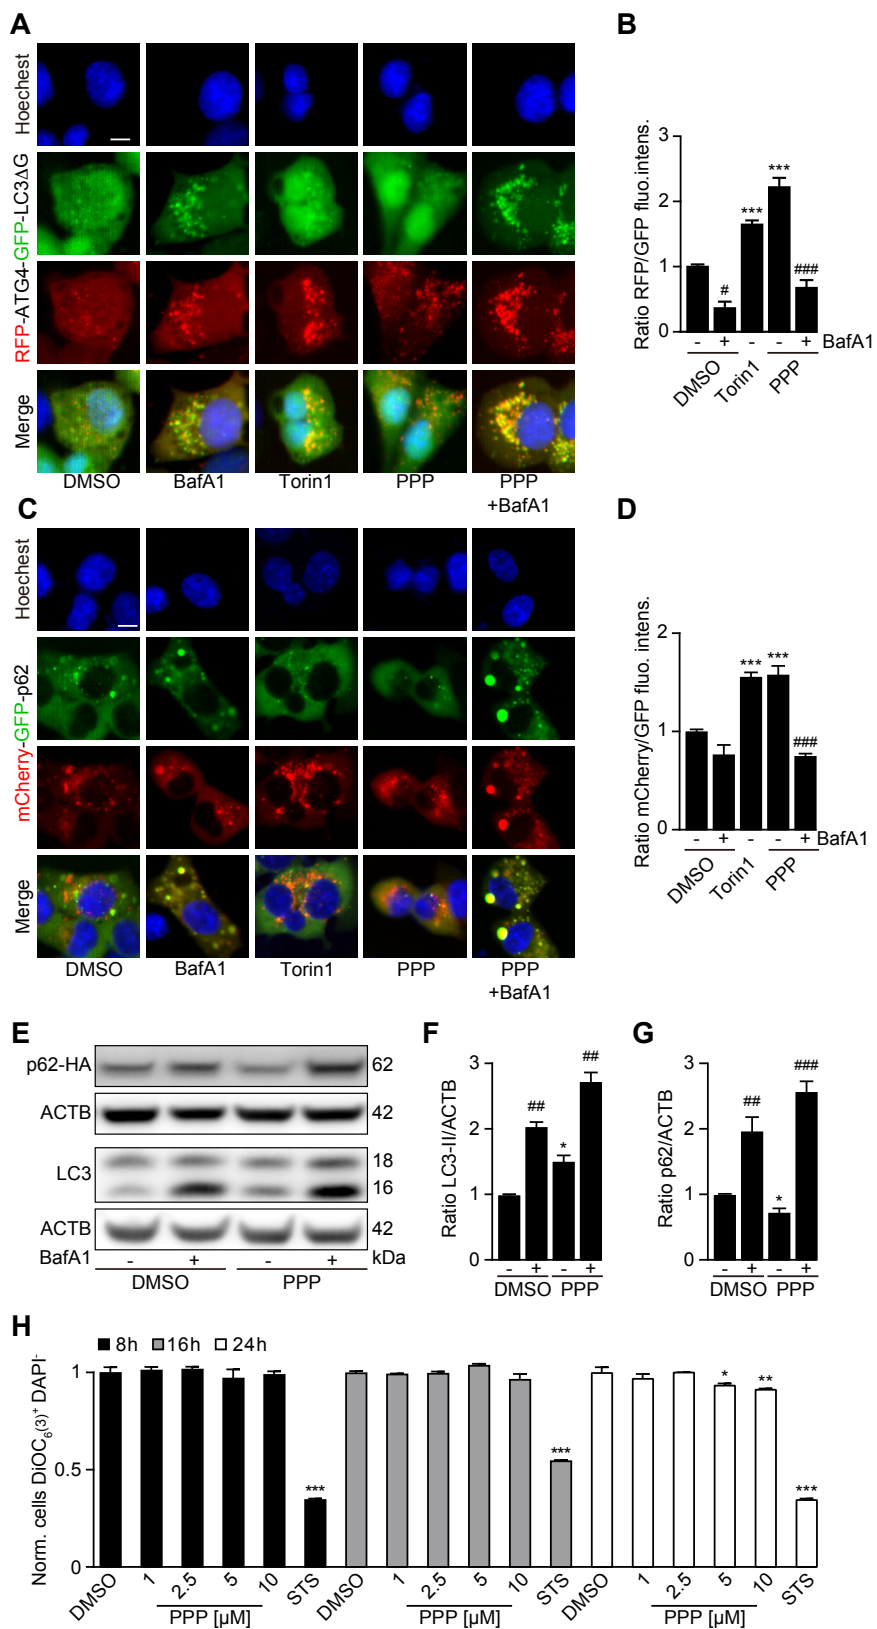

Figure S2

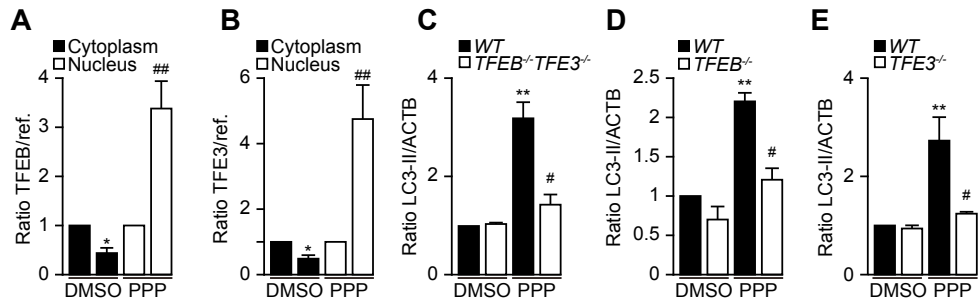

Figure S3

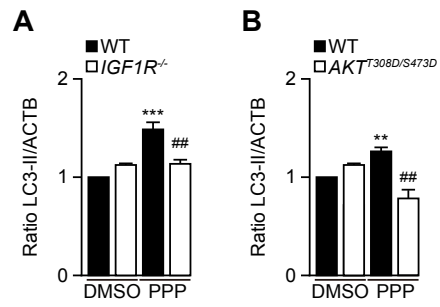**Figure S4**

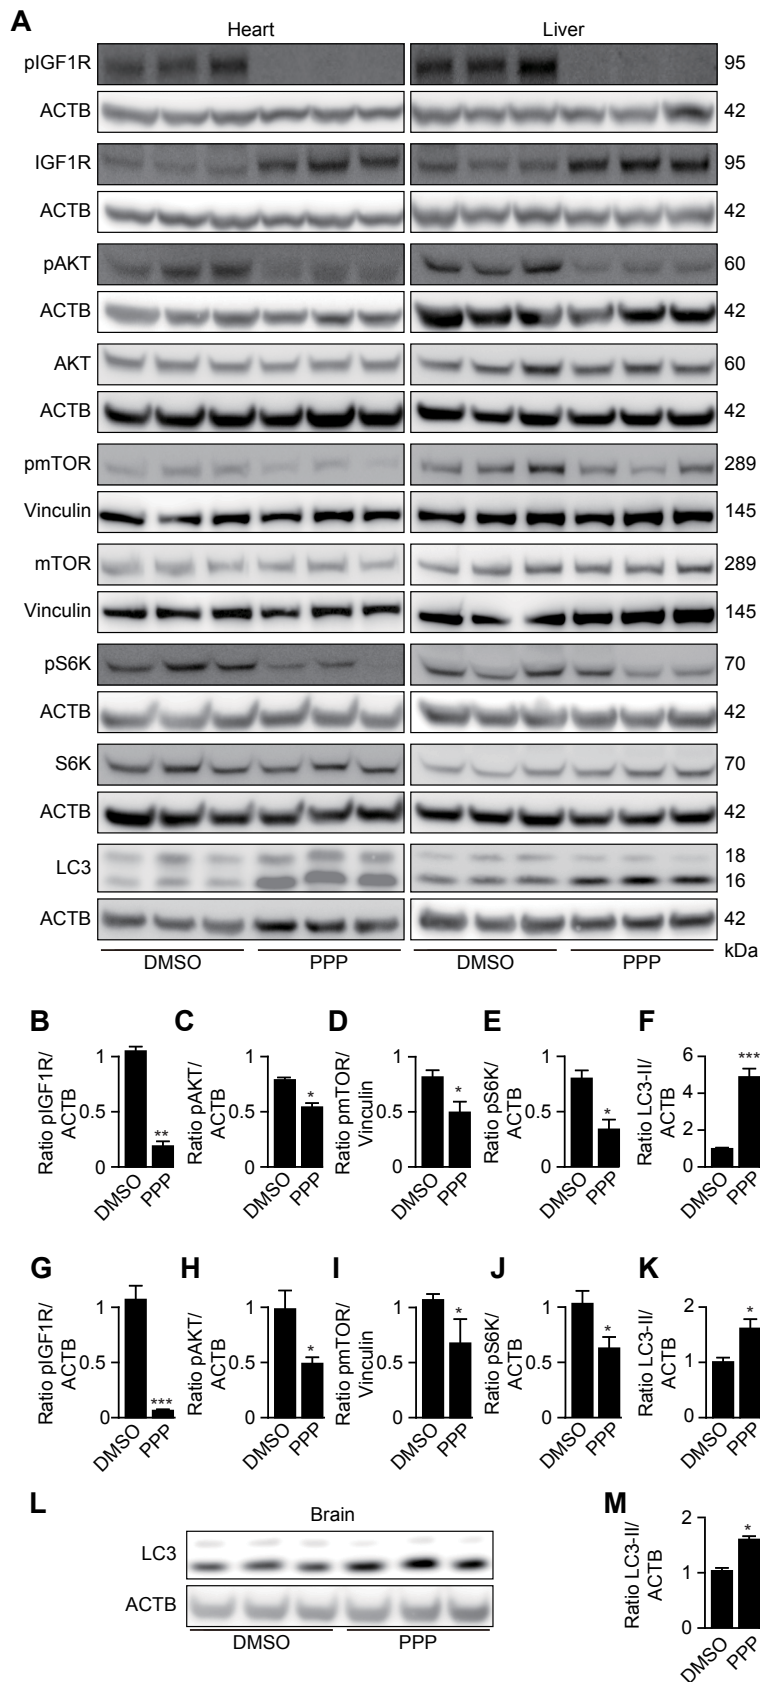

Figure S5

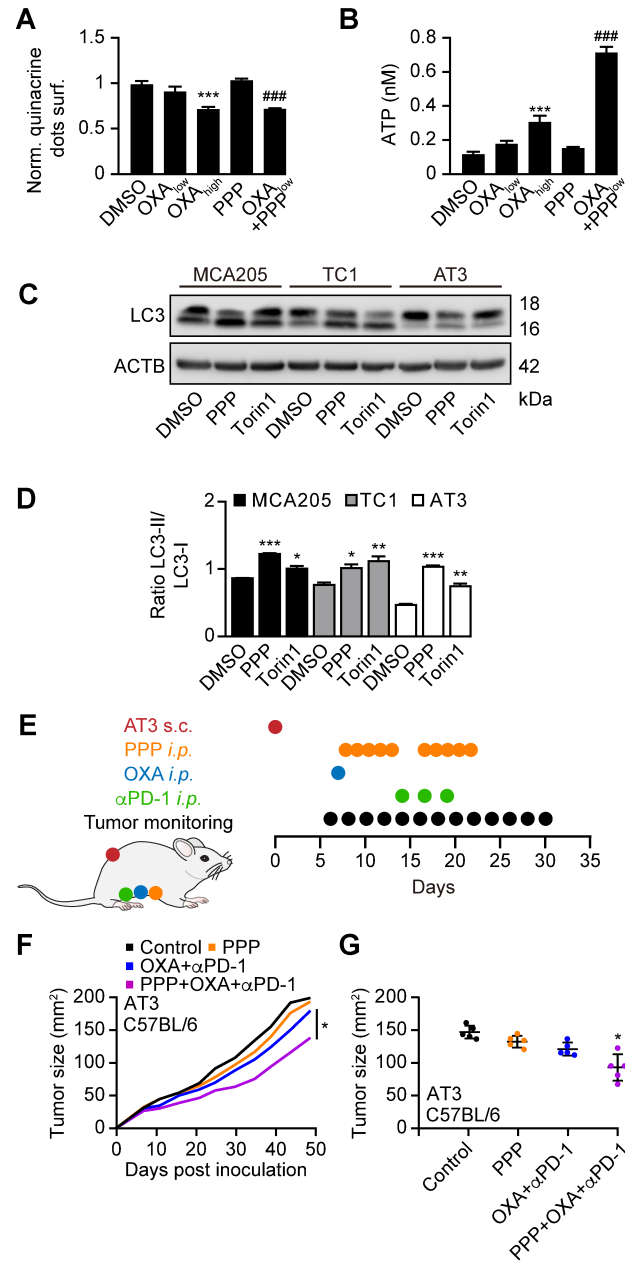

Figure S6

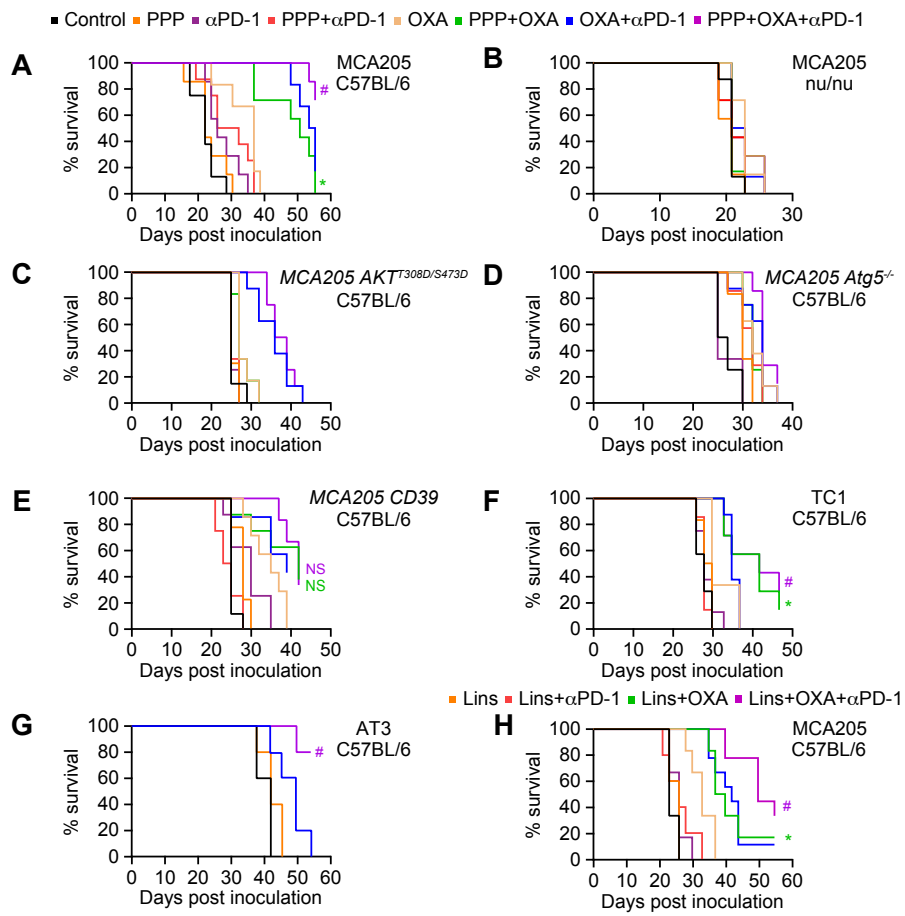

Figure S7

Supplement: jitc-2021-002722supp001.pdf [file jitc-2021-002722supp001.pdf]
